# Supplementary material for: Dilute anion alloyed III-nitride nanowires for photoelectrochemical water splitting
Source: Royal Society of Chemistry journal article supplement (doi:10.1039/d4ya00584h), 2025-01-01
Supplement: d4ya00584h1.pdf [file d4ya00584h1.pdf]

ARTICLE

# Supplementary Materials of Dilute Anion Alloyed III-Nitride Nanowires for Photoelectrochemical Water Splitting

Received 00th January 20xx,  
Accepted 00th January 20xx

DOI: 10.1039/x0xx00000x

S. J. Calero-Barney,<sup>a</sup> A. C. Nouduri,<sup>a</sup> A.N. Andriotis,<sup>b</sup> M. Menon<sup>a</sup> and M. K. Sunkara<sup>a\*</sup>

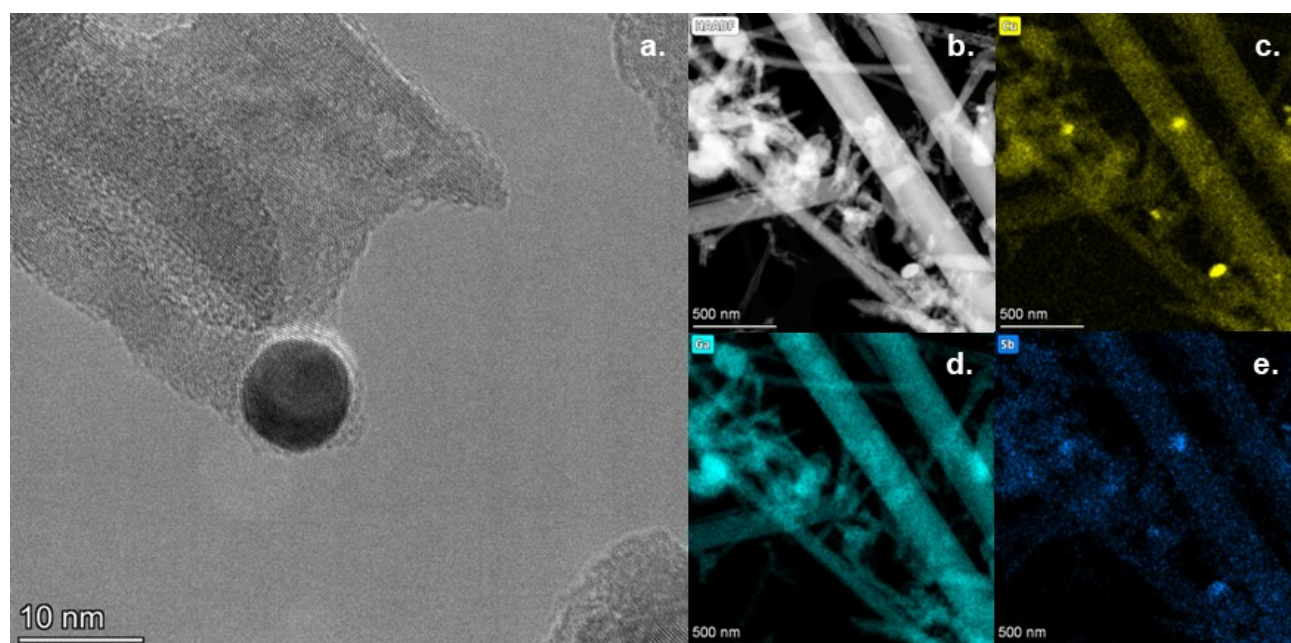

Figure S 1 High resolution Transmission Electron Micrograph of a.  $\text{GaSb}_x\text{N}_{1-x}$  wires grown at 850 °C, b. the corresponding High-angle annular dark-field image, and the elemental mapping of c. copper, d. gallium and e. antimony.

<sup>a</sup> Conn Center for Renewable Energy Research, University of Louisville, Louisville, Kentucky 40292.

<sup>b</sup> Institute of Electronic Structure and Laser, FORTH, P.O. Box 1527, 71110 Herakilo, Crete, Greece.

\* Corresponding authors. E-mail: mahendra@louisville.edu

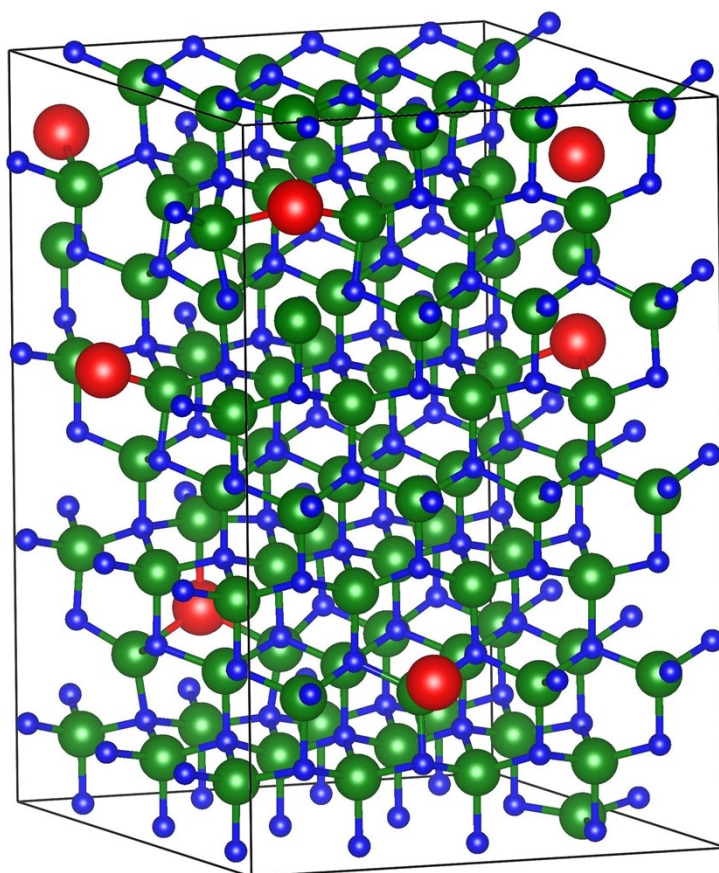

Figure S 2 GaBi<sub>y</sub>N<sub>1-y</sub> supercell with  $y=5/96$  optimized using DFT simulations. The Bi atoms are shown in red, Ga in green and N in blue.

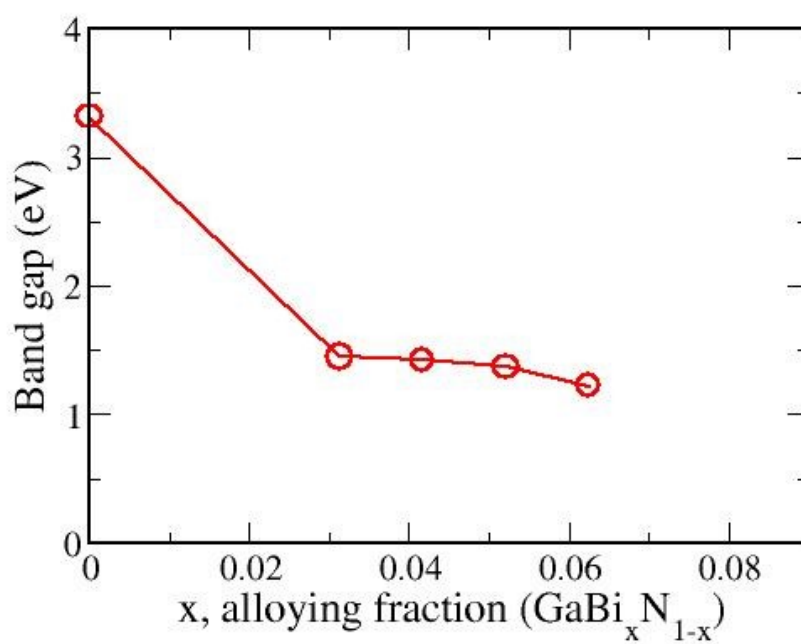

Figure S 3 Plot showing band gap dependence on Bi concentration. A sharp initial drop in the gap value is followed by a more gradual decline for larger concentration.

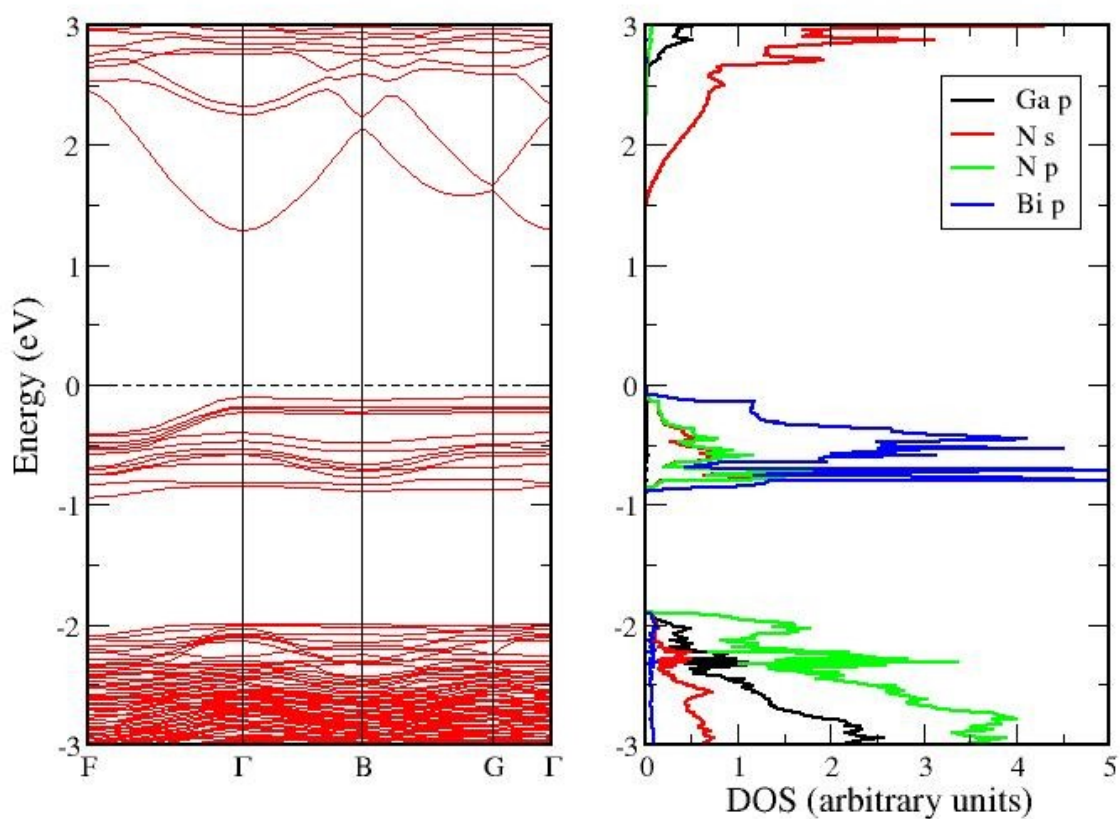

The gap is within visible region for Bi concentration up to 3%.

Figure S 4 Calculated band structure and PDOS for the  $\text{GaBi}_y\text{N}_{1-y}$  alloy with  $y=4/96$ .

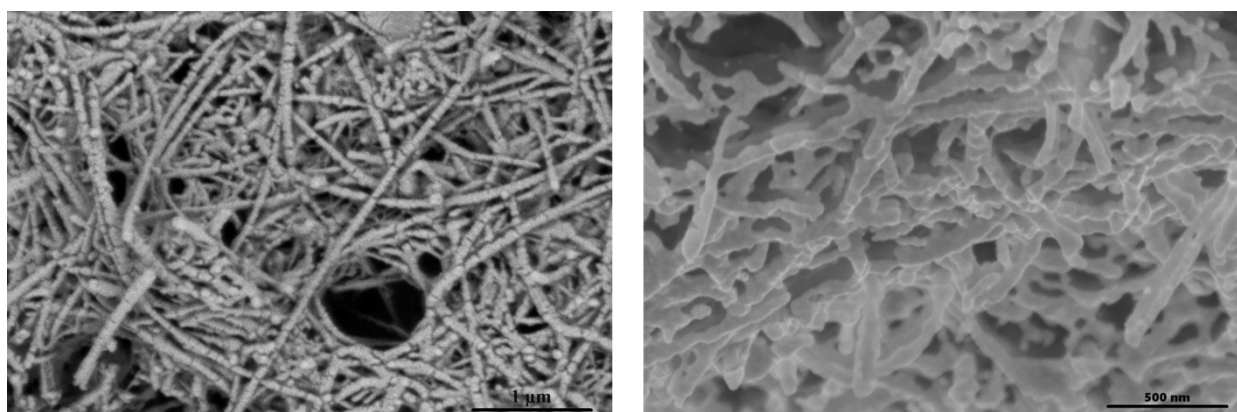

Figure S5. SEM images of two different  $\text{Ga}_{1-x}\text{Sb}_x\text{N}$  nanowire samples after they were used in photoelectrochemical testing. Both samples were sensitized with OER electrocatalyst,  $\text{W}_{0.98}\text{Ir}_{0.02}\text{O}_{3-\delta}$ .



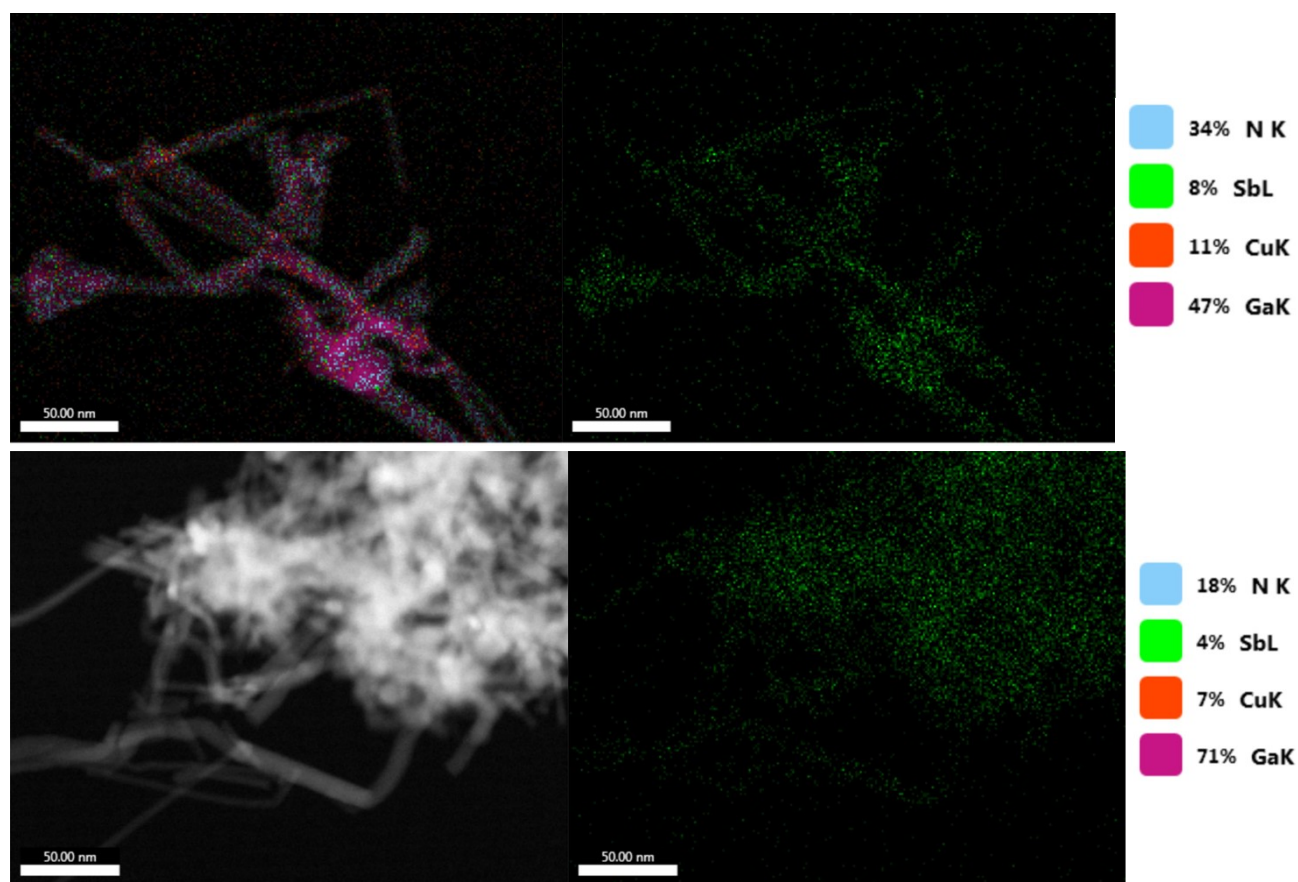

**Figure S6.** TEM-EDS data for GaSb<sub>x</sub>N<sub>1-x</sub> nanowires for two samples indicating quantification of Sb presence and uniformity of distribution throughout wires.

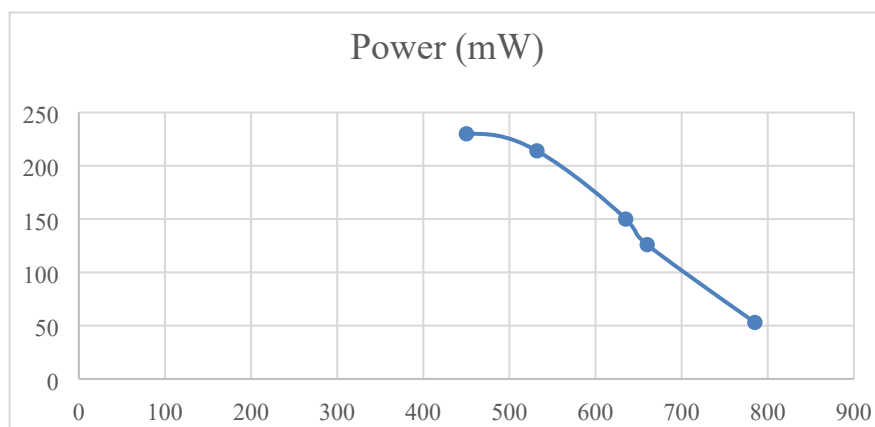

**Figure S7.** Intensity as function of wavelength measured using a Si photo-diode.
